# Supplementary material for: A Conserved EAR Motif Is Required for Avirulence and Stability of the Ralstonia solanacearum Effector PopP2 In Planta
Source: Front Plant Sci. 2017 Aug 2;8:1330. doi: 10.3389/fpls.2017.01330 (PMC5539180; doi:10.3389/fpls.2017.01330)
Supplement: Supplementary file 1 [file Presentation_1.pdf]

## *Supplementary Material*

### **A conserved EAR motif is required for avirulence and stability of the *Ralstonia solanacearum* effector PopP2 in *planta***

Cécile Segonzac<sup>†\*</sup>, Toby E. Newman<sup>†</sup>, Sera Choi, Jay Jayaraman, Du Seok Choi, Gayoung Jung, Heejung Cho, Young Kee Lee, Kee Hoon Sohn<sup>\*</sup>

<sup>†</sup>These authors have contributed equally to this work

\*Correspondence: [khsohn@postech.ac.kr](mailto:khsohn@postech.ac.kr), [csegonzac@snu.ac.kr](mailto:csegonzac@snu.ac.kr)

The Supplementary Material for this article includes 5 figures, 1 table and references.

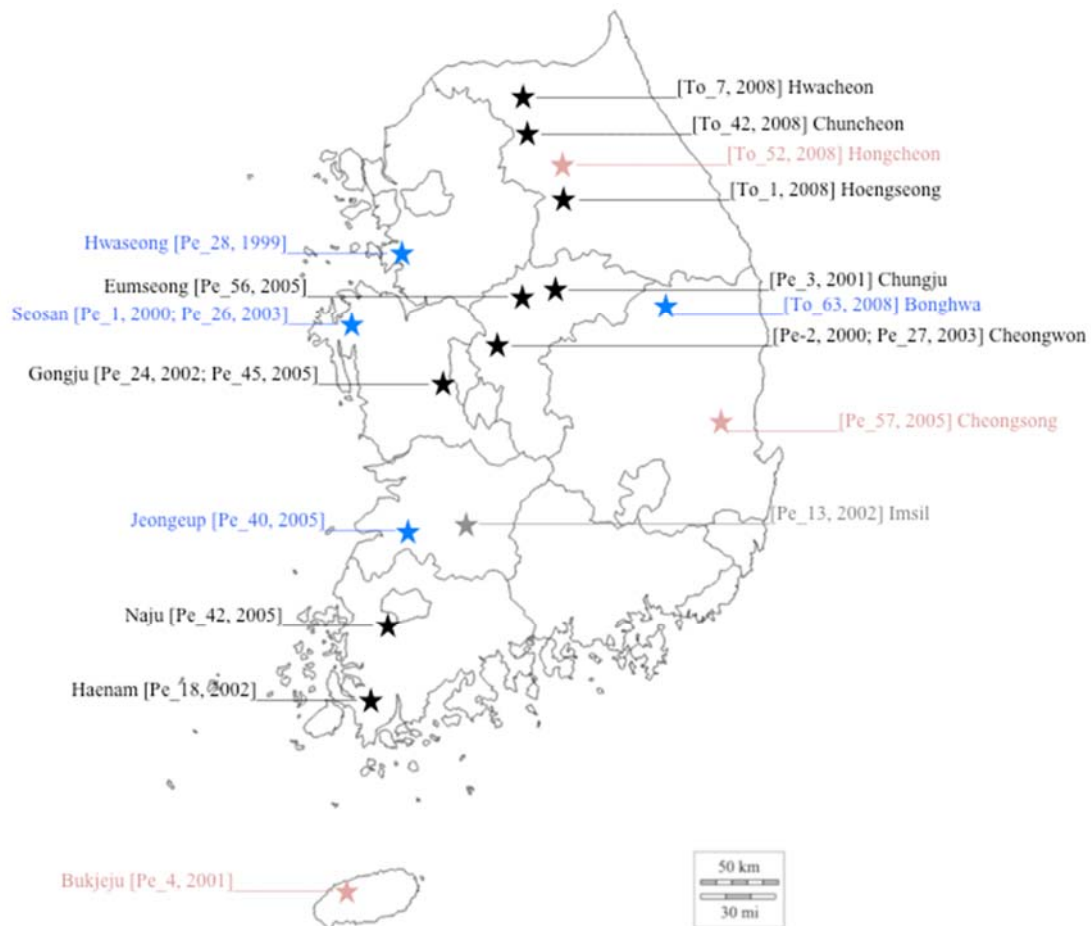

**Supplementary Figure 1. Regional map of the Republic of Korea with location of strain isolation.** Strains labelled in pink did not harbor *popP2* (Pe\_4, Pe\_57, To\_52). Strains labelled in blue harbored the “Pe\_1” allele (Pe\_1, Pe\_26, Pe\_28, Pe\_40 and To\_63). Strains labelled in black harbored the “Pe\_2” allele (Pe\_2, Pe\_3, Pe\_18, Pe\_24, Pe\_27, Pe\_45, Pe\_56, To\_1, To\_7 and To\_42). Pe\_13 is labelled in grey.

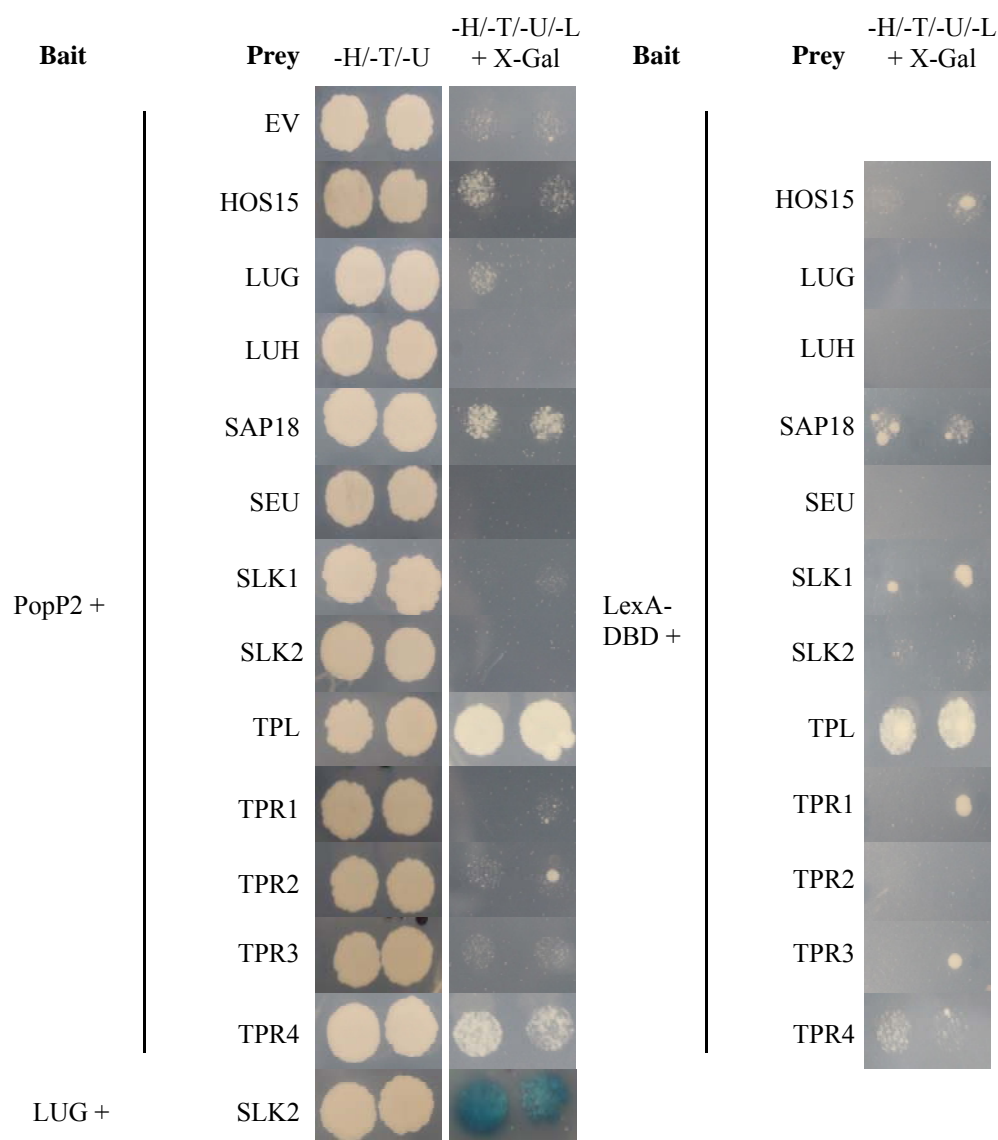

**Supplementary Figure 2. PopP2 does not interact with known transcriptional co-repressors in yeast.** Growth of yeast cells expressing LexA-DNA-binding domain (DBD) fusion (bait) and B42-activation domain (AD) fusion (prey) as indicated. Yeast cells were grown on non-selective media lacking histidine, tryptophan and uracil (-H/-T/-U) or selective media also lacking leucine (-H/-T/-U/-L) and supplemented with X-Gal. TPL, TPR4 and SAP18 B42-AD fusions are weakly auto-active as indicated by the growth of yeast cells expressing LexA-DBD alone and B42-AD protein fusions. This experiment was conducted twice with similar results.

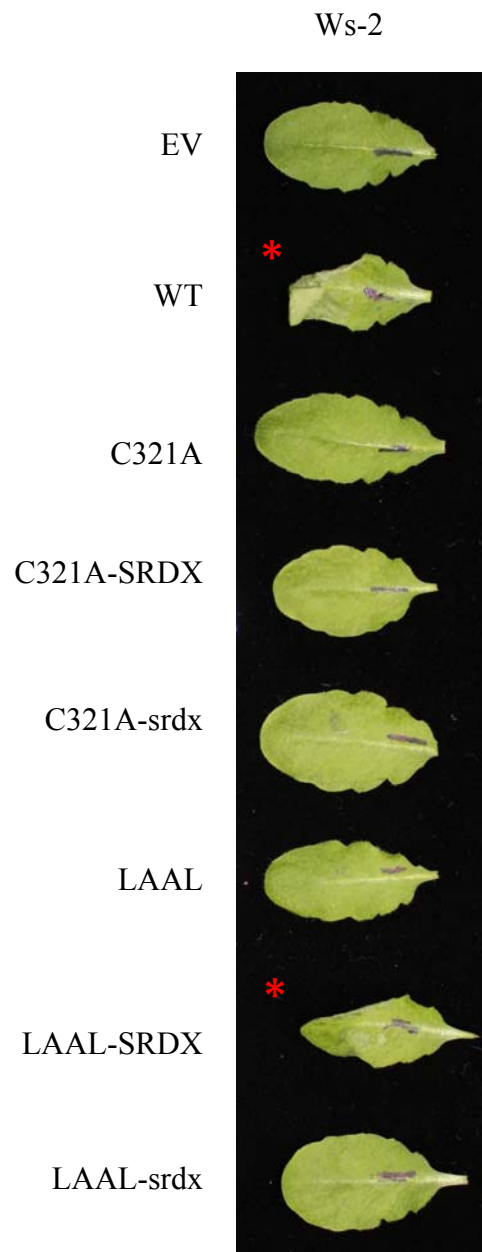

**Supplementary Figure 3. The SRDX motif partially restores PopP2<sup>LAAL</sup> avirulence activity in Arabidopsis.** PopP2 variants C-terminally tagged with 6xHA were delivered by *Pseudomonas fluorescens* Pf0-1(T3S) into Ws-2 leaves and photographs were taken 1 day after infiltration. A red asterisk indicates visible cell death. This experiment was conducted 3 times with similar results.

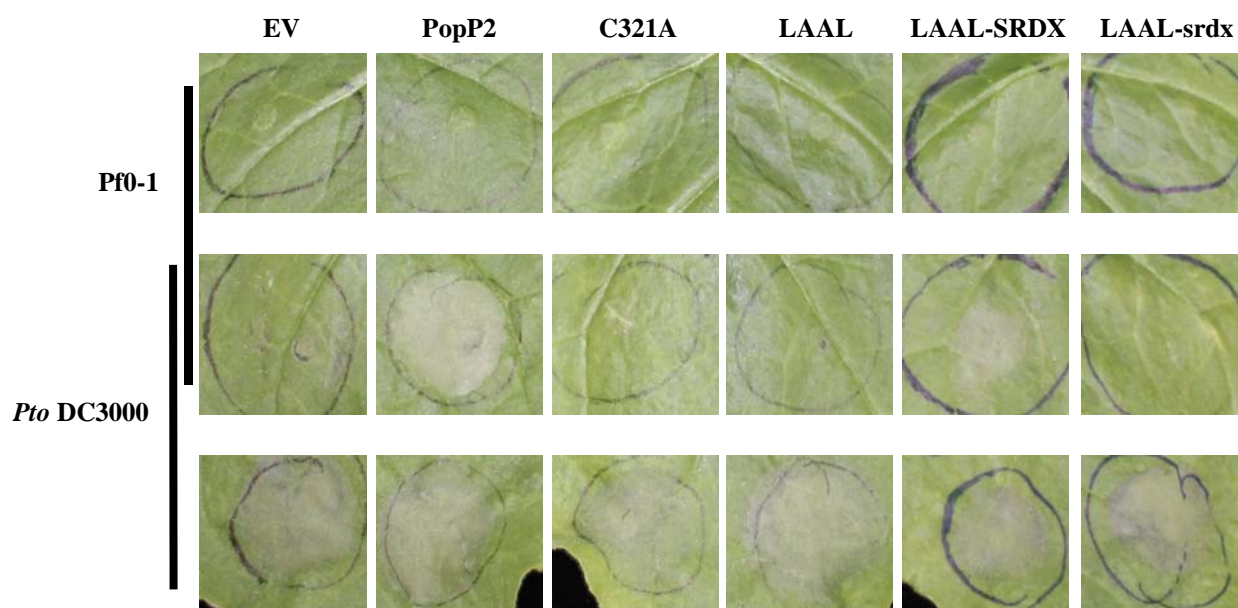

**Supplementary Figure 4. The EAR motif is required for PopP2-mediated inhibition of *P. fluorescens* Pf0-1-induced PTI in *N. benthamiana*.**  $3 \times 10^8$  cfu/ml of *P. fluorescens* Pf0-1 carrying empty vector or PopP2 variants (WT, C321A, LAAL, LAAL-SRDX or LAAL-srdx) were infiltrated in 5-week old *N. benthamiana* leaves (in indicated circles as 'Pf0-1'). After 8hours,  $2 \times 10^7$  cfu/ml of *Pto* DC3000 was infiltrated (in indicated circles as 'DC3000'). *Pto* DC3000-triggered tissue collapse was scored at 48hpi after *Pto* DC3000 infiltration. This experiment was conducted 4 times with similar results.

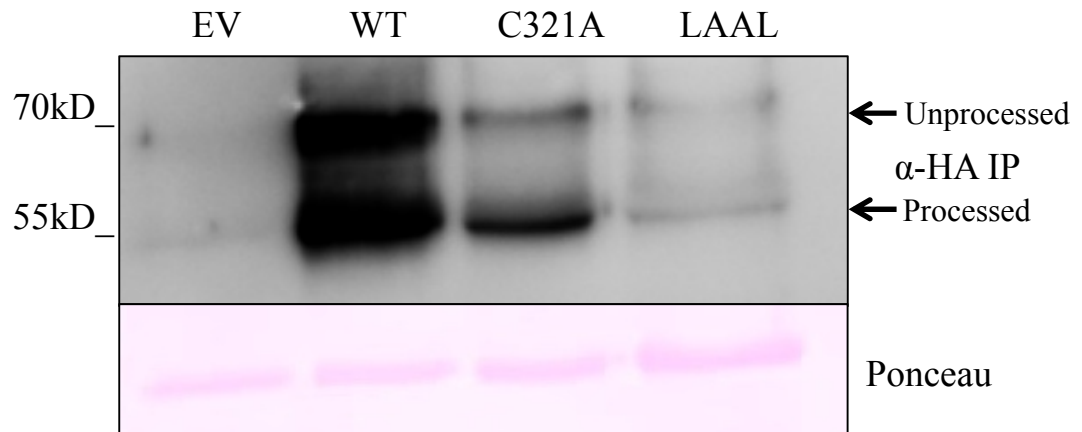

**Supplementary Figure 5. *In planta* processing of *Pto* DC3000-delivered AvrRps4N:PopP2:6xHA variants in *N. benthamiana*.** The AvrRps4N:PopP2 variants C-terminally tagged with 6xHA were delivered by *Pto* DC3000 ( $1 \times 10^9$  cfu/ml) in *N. benthamiana*. *N. benthamiana* leaf samples were harvested at 10 hours post infiltration. Protein accumulation of PopP2 variants was confirmed by immunoprecipitation followed by immunoblot analysis using  $\alpha$ -HA antibody. Protein loading was confirmed with Ponceau staining.

| Corepressor | Chromatin modifier (HDAC)        | Repressor recruitment | Cofactor recruitment                           | References                                                                                 |
|-------------|----------------------------------|-----------------------|------------------------------------------------|--------------------------------------------------------------------------------------------|
| HOS15       | HOS15                            | Unknown               |                                                | Zhu et al., 2008                                                                           |
| LUG         | HDA19                            | -                     |                                                | Gonzalez et al., 2007                                                                      |
| LUH         | Unknown                          | -                     |                                                | Shrestha et al., 2014                                                                      |
| SAP18       | HDA19                            | EAR motif             |                                                | Song & Galbraith, 2006; Hill et al., 2008                                                  |
| SEU         | - LUG - HDA19<br>- LUH - Unknown | Unknown               | LIFS domain of LUG to form corepressor complex | Sridhar et al., 2004; Sitaraman et al., 2008; Gonzalez et al., 2007; Shrestha et al., 2014 |
| SLK1        | - LUG - HDA19<br>- LUH - Unknown | Unknown               |                                                | Gonzalez et al., 2007<br>Stahle et al., 2009; Shrestha et al., 2014                        |
| SLK2        | - LUG - HDA19<br>- LUH - Unknown | Unknown               |                                                | Gonzalez et al., 2007<br>Stahle et al., 2009; Shrestha et al., 2014                        |
| TPL         | HDA19                            | EAR motif             |                                                | Long et al., 2006; Szemenyei et al., 2008; Causier et al., 2012; Krogan et al., 2012       |
| TPR1        | HDA19                            | EAR motif             |                                                | Zhu et al., 2010; Causier et al., 2012; Lee et al., 2016                                   |
| TPR2        | Unknown, likely HDA19            | EAR motif             |                                                | Causier et al., 2012; Lee et al., 2016                                                     |
| TPR3        | Unknown, likely HDA19            | EAR motif             |                                                | Causier et al., 2012; Lee et al., 2016                                                     |
| TPR4        | Unknown, likely HDA19            | EAR motif             |                                                | Causier et al., 2012; Lee et al., 2016                                                     |

**Supplementary Table 1. Co-repressor library screened in the Y2H assay.** Details of the co-repressor library screened for interaction with PopP2 in the yeast-two-hybrid (Y2H) assay.

## Supplementary References

- Causier, B., Ashworth, M., Guo, W., and Davies, B. (2012). The TOPLESS interactome: a framework for gene repression in Arabidopsis. *Plant physiology* 158(1), 423-438.
- Gonzalez, D., Bowen, A.J., Carroll, T.S., and Conlan, R.S. (2007). The transcription corepressor LEUNIG interacts with the histone deacetylase HDA19 and mediator components MED14 (SWP) and CDK8 (HEN3) to repress transcription. *Molecular and cellular biology* 27(15), 5306-5315.
- Hill, K., Wang, H., and Perry, S.E. (2008). A transcriptional repression motif in the MADS factor AGL15 is involved in recruitment of histone deacetylase complex components. *The Plant Journal* 53(1), 172-185.
- Krogan, N.T., Hogan, K., and Long, J.A. (2012). APETALA2 negatively regulates multiple floral organ identity genes in Arabidopsis by recruiting the co-repressor TOPLESS and the histone deacetylase HDA19. *Development* 139(22), 4180-4190.
- Lee, M.-S., An, J.-H., and Cho, H.-T. (2016). Biological and molecular functions of two EAR motifs of Arabidopsis IAA7. *Journal of Plant Biology* 59(1), 24-32.
- Le Roux, C., Huet, G., Jauneau, A., Camborde, L., Tremousaygue, D., Kraut, A., Zhou, B., Levaillant, M., Adachi, H., Yoshioka, H., Raffaele, S., Berthome, R., Coute, Y., Parker, J., Deslandes, L., 2015. A Receptor Pair with an Integrated Decoy Converts Pathogen Disabling of Transcription Factors to Immunity. *Cell* 161, 1074–1088. doi:10.1016/j.cell.2015.04.025
- Long, J.A., Ohno, C., Smith, Z.R., and Meyerowitz, E.M. (2006). TOPLESS regulates apical embryonic fate in Arabidopsis. *Science* 312(5779), 1520-1523.
- Shrestha, B., Guragain, B., and Sridhar, V.V. (2014). Involvement of co-repressor LUH and the adapter proteins SLK1 and SLK2 in the regulation of abiotic stress response genes in Arabidopsis. *BMC plant biology* 14(1), 54.
- Sitaraman, J., Bui, M., and Liu, Z. (2008). LEUNIG\_HOMOLOG and LEUNIG perform partially redundant functions during Arabidopsis embryo and floral development. *Plant physiology* 147(2), 672-681.
- Song, C.-P., and Galbraith, D.W. (2006). AtSAP18, an orthologue of human SAP18, is involved in the regulation of salt stress and mediates transcriptional repression in Arabidopsis. *Plant molecular biology* 60(2), 241-257.
- Sridhar, V.V., Surendrarao, A., Gonzalez, D., Conlan, R.S., and Liu, Z. (2004). Transcriptional repression of target genes by LEUNIG and SEUSS, two interacting regulatory proteins for Arabidopsis flower development. *Proceedings of the National Academy of Sciences of the United States of America* 101(31), 11494-11499.
- Stahle, M.I., Kuehlich, J., Staron, L., von Arnim, A.G., and Golz, J.F. (2009). YABBYs and the transcriptional corepressors LEUNIG and LEUNIG\_HOMOLOG maintain leaf polarity and meristem activity in Arabidopsis. *The Plant Cell* 21(10), 3105-3118.
- Szemenyei, H., Hannon, M., and Long, J.A. (2008). TOPLESS mediates auxin-dependent transcriptional repression during Arabidopsis embryogenesis. *Science* 319(5868), 1384-1386.
- Zhu, J., Jeong, J.C., Zhu, Y., Sokolchik, I., Miyazaki, S., Zhu, J.-K., et al. (2008). Involvement of Arabidopsis HOS15 in histone deacetylation and cold tolerance. *Proceedings of the National Academy of Sciences* 105(12), 4945-

4950.

Zhu, Z., Xu, F., Zhang, Y., Cheng, Y.T., Wiermer, M., Li, X., et al. (2010). Arabidopsis resistance protein SNC1 activates immune responses through association with a transcriptional corepressor. *Proc Natl Acad Sci U S A* 107(31), 13960-13965. doi: 10.1073/pnas.1002828107.
